# Supplementary material
Source: PubMed Central journal article supplement (PMC4361410)
Supplement: Supp_Fig1.pdf [file Supp_Fig1.pdf]

## Supplementary Data

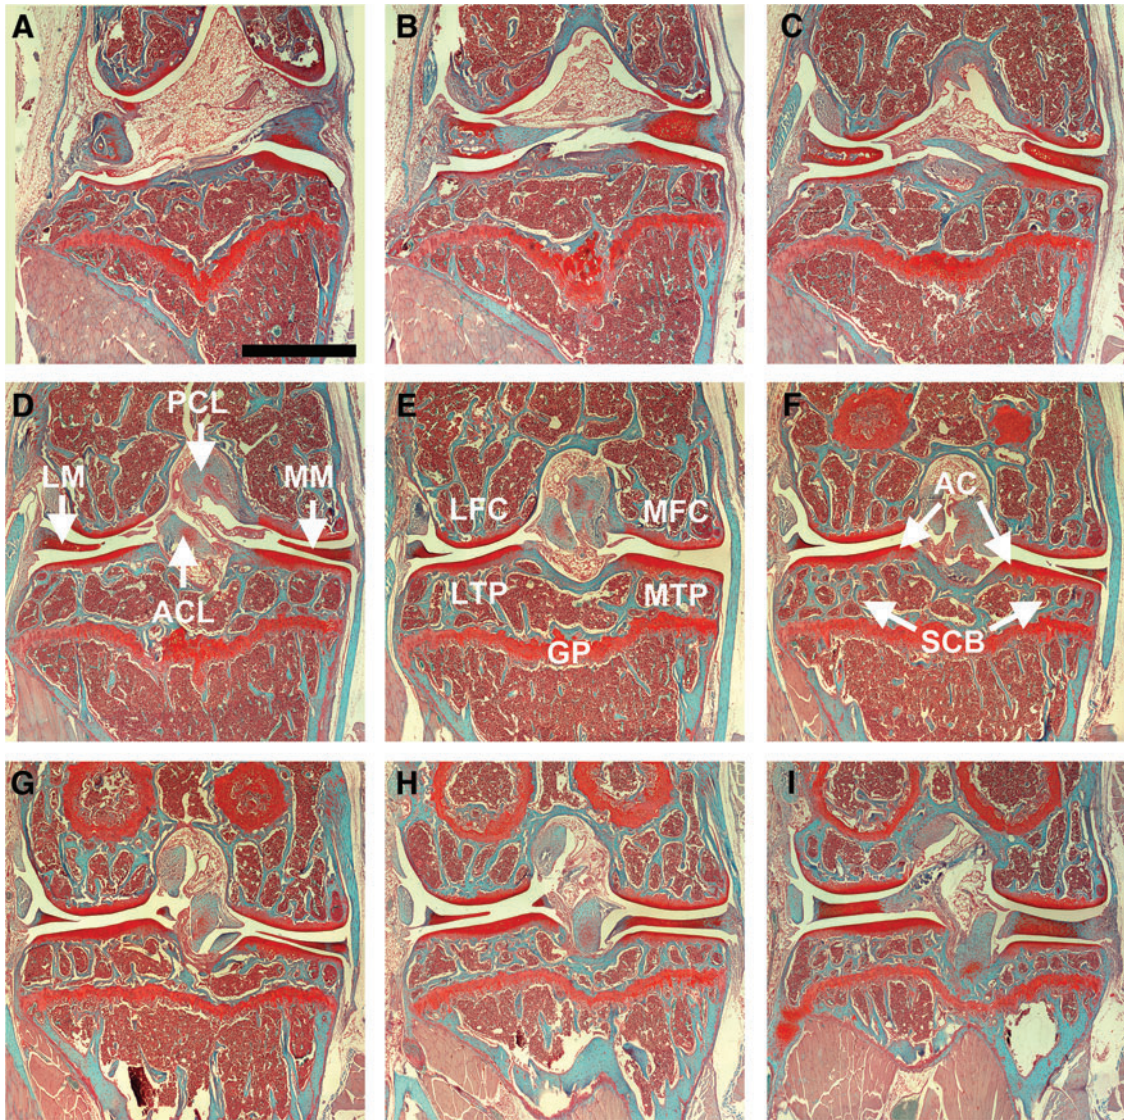

**SUPPLEMENTARY FIG. S1.** (A–I) Anterior to posterior coronal sections from sequential levels at  $80\ \mu\text{m}$  intervals through the knee joint of a 16-week-old male C57BL/6 mouse stained with Safranin-O Fast-Green. Bone is stained green and cartilage red. Scale bar = 1 mm. PCL, posterior cruciate ligament; LM, lateral meniscus; MM, medial meniscus; ACL, anterior cruciate ligament; LFC, lateral femoral condyle; MFC, medial femoral condyle; LTP, lateral tibial plateau; MTP, medial tibial plateau; GP, growth plate; AC, articular cartilage; SCB, subchondral bone.
